# Supplementary material for: A quantitative proteomic response of hepatocellular carcinoma Hep3B cells to danusertib, a pan-Aurora kinase inhibitor
Source: PubMed Central journal article supplement — J Cancer. 2018 May 24;9(12):2061–71. doi: 10.7150/jca.20822 (PMC6010685; doi:10.7150/jca.20822), 2018-05-24
Supplement: jcav09p2061s1.pdf [file jcav09p2061s1.pdf]

## Supplementary files

Figure S1. The IPA results showed that 109 signaling pathways were regulated by Danu in Hep3B cell line.

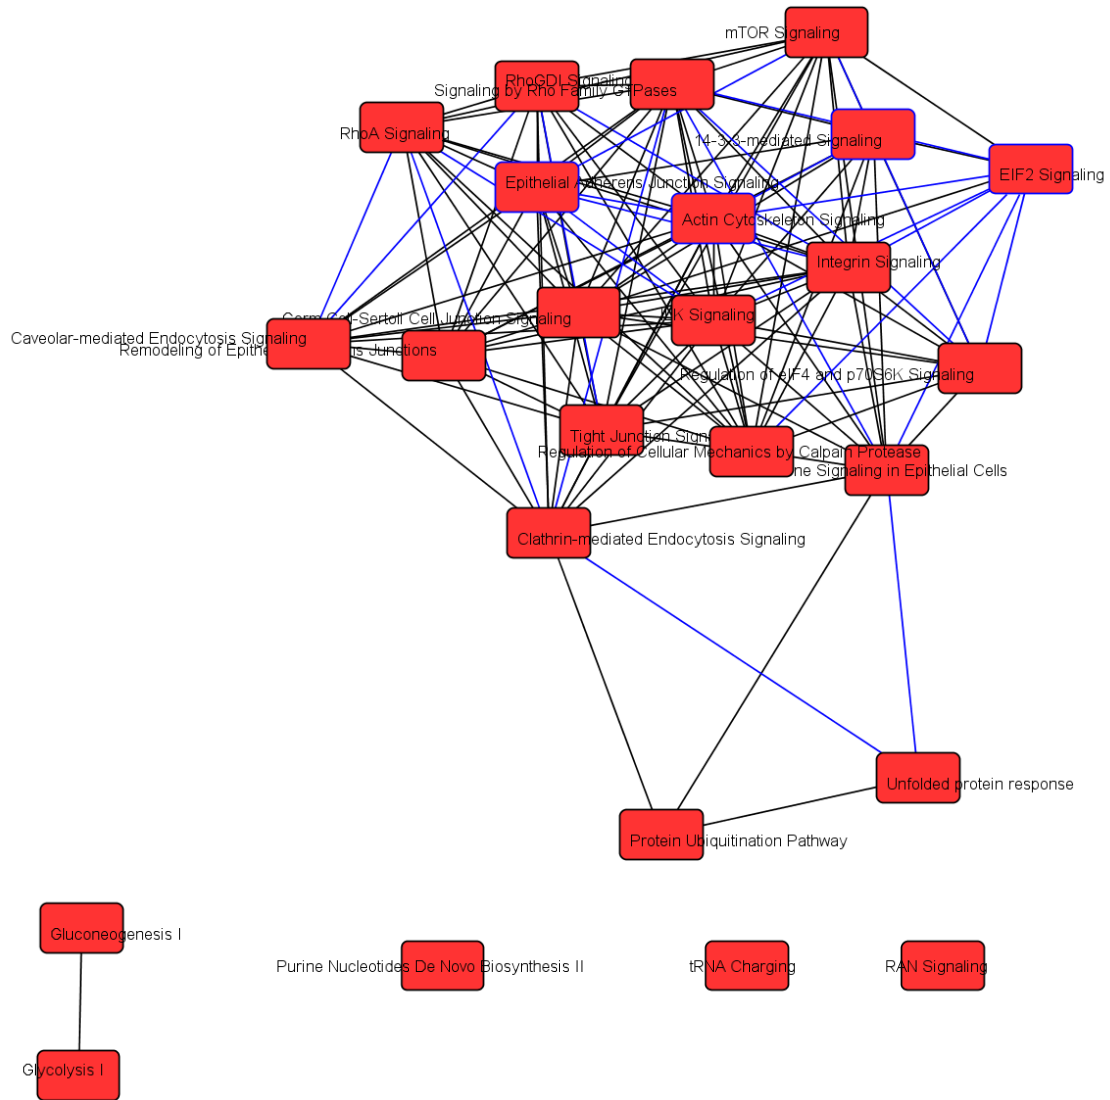

Table S1. The 542 protein molecules regulated by Danu in Hep3B cells.

|    | <b>Protein IDs</b> | <b>Protein Names</b>                                                     | <b>Gene Names</b> | <b>H/L Ratio</b> |
|----|--------------------|--------------------------------------------------------------------------|-------------------|------------------|
| 1  | P35613             | Basigin                                                                  | <i>BSG</i>        | 1.964            |
| 2  | P21266             | Glutathione S-transferase Mu 3                                           | <i>GSTM3</i>      | 1.740            |
| 3  | E9PHY5             | Band 4.1-like protein 2                                                  | <i>EPB41L2</i>    | 1.723            |
| 4  | P0DMN0             | —                                                                        | <i>SULT1A4</i>    | 1.608            |
| 5  | C9JZR2             | Catenin delta-1                                                          | <i>CTNND1</i>     | 1.557            |
| 6  | P07942             | Laminin subunit beta-1                                                   | <i>LAMB1</i>      | 1.517            |
| 7  | P28482             | Mitogen-activated protein kinase 1                                       | <i>MAPK1</i>      | 1.517            |
| 8  | P09960             | Leukotriene A-4 hydrolase                                                | <i>LTA4H</i>      | 1.517            |
| 9  | P20618             | Proteasome subunit beta type-1                                           | <i>PSMB1</i>      | 1.454            |
| 10 | Q9C005             | Protein dpy-30 homolog                                                   | <i>DPY30</i>      | 1.446            |
| 11 | Q99733             | Nucleosome assembly protein 1-like 4                                     | <i>NAP1L4</i>     | 1.421            |
| 12 | O14980             | Exportin-1                                                               | <i>XPO1</i>       | 1.408            |
| 13 | K7EJR3             | 26S proteasome non-ATPase regulatory subunit 8                           | <i>PSMD8</i>      | 1.394            |
| 14 | B0QYK0             | RNA-binding protein EWS                                                  | <i>EWSR1</i>      | 1.381            |
| 15 | O75643             | U5 small nuclear ribonucleoprotein 200 kDa helicase                      | <i>SNRNP200</i>   | 1.358            |
| 16 | F5H3U9             | Protein mago nashi homolog                                               | <i>MAGOHB</i>     | 1.345            |
| 17 | Q15019             | Septin-2                                                                 | <i>SEPT2</i>      | 1.340            |
| 18 | B4DGU4             | Catenin beta-1                                                           | <i>CTNNB1</i>     | 1.326            |
| 19 | P35579             | Myosin-9                                                                 | <i>MYH9</i>       | 1.306            |
| 20 | Q9P0L0             | Vesicle-associated membrane protein-associated protein A                 | <i>VAPA</i>       | 1.301            |
| 21 | P00367             | Glutamate dehydrogenase 1, mitochondrial                                 | <i>GLUD1</i>      | 1.297            |
| 22 | Q9Y2V2             | Calcium-regulated heat stable protein 1                                  | <i>CARHSP1</i>    | 1.296            |
| 23 | P04843             | Dolichyl-diphosphooligosaccharide--protein glycosyltransferase subunit 1 | <i>RPN1</i>       | 1.294            |
| 24 | P52292             | Importin subunit alpha-1                                                 | <i>KPNA2</i>      | 1.293            |
| 25 | Q9P258             | Protein RCC2                                                             | <i>RCC2</i>       | 1.288            |
| 26 | O75369             | Filamin-B                                                                | <i>FLNB</i>       | 1.285            |
| 27 | P31930             | Cytochrome b-c1 complex subunit 1, mitochondrial                         | <i>UQCRC1</i>     | 1.279            |
| 28 | Q8N8S7             | Protein enabled homolog                                                  | <i>ENAH</i>       | 1.275            |
| 29 | P38919             | Eukaryotic initiation factor 4A-III                                      | <i>EIF4A3</i>     | 1.272            |
| 30 | Q04917             | 14-3-3 protein eta                                                       | <i>YWHAH</i>      | 1.269            |
| 31 | C9JRL4             | —                                                                        | <i>MDH1</i>       | 1.269            |
| 32 | F8W1N5             | Nascent polypeptide-associated complex subunit alpha                     | <i>NACA</i>       | 1.259            |
| 33 | G8JLD5             | Dynamin-1-like protein                                                   | <i>DNM1L</i>      | 1.252            |
| 34 | P17655             | Calpain-2 catalytic subunit                                              | <i>CAPN2</i>      | 1.249            |
| 35 | P00441             | Superoxide dismutase [Cu-Zn]                                             | <i>SOD1</i>       | 1.244            |
| 36 | P22314             | Ubiquitin-like modifier-activating enzyme 1                              | <i>UBA1</i>       | 1.243            |
| 37 | H7C4B7             | Delta(24)-sterol reductase                                               | <i>DHCR24</i>     | 1.236            |
| 38 | P35237             | Serpin B6                                                                | <i>SERPINB6</i>   | 1.233            |
| 39 | O95865             | N(G),N(G)-dimethylarginine dimethylaminohydrolase 2                      | <i>DDAH2</i>      | 1.233            |
| 40 | Q8TAT6             | Nuclear protein localization protein 4 homolog                           | <i>NPLOC4</i>     | 1.232            |
| 41 | P49748             | Very long-chain specific acyl-CoA dehydrogenase, mitochondrial           | <i>ACADVL</i>     | 1.231            |

|    |        |                                                                       |                    |       |
|----|--------|-----------------------------------------------------------------------|--------------------|-------|
| 42 | P38117 | Electron transfer flavoprotein subunit beta                           | <i>ETFB</i>        | 1.227 |
| 43 | Q6XQN6 | Nicotinate phosphoribosyltransferase                                  | <i>NAPRT1</i>      | 1.227 |
| 44 | P19105 | Myosin regulatory light chain 12A                                     | <i>MYL12A</i>      | 1.225 |
| 45 | P49589 | Cysteine--tRNA ligase, cytoplasmic                                    | <i>CARS</i>        | 1.223 |
| 46 | Q8IV08 | Phospholipase D3                                                      | <i>PLD3</i>        | 1.222 |
| 47 | P11413 | Glucose-6-phosphate 1-dehydrogenase                                   | <i>G6PD</i>        | 1.221 |
| 48 | Q86V81 | THO complex subunit 4                                                 | <i>ALYREF</i>      | 1.220 |
| 49 | P25325 | 3-mercaptopyruvate sulfurtransferase                                  | <i>MPST</i>        | 1.218 |
| 50 | H3BQF1 | Adenine phosphoribosyltransferase                                     | <i>APRT</i>        | 1.215 |
| 51 | H3BQZ7 | Heterogeneous nuclear ribonucleoprotein U-like protein 2              | <i>hCG_2044799</i> | 1.213 |
| 52 | P08107 | Heat shock 70 kDa protein 1A/1B                                       | <i>HSPA1A</i>      | 1.212 |
| 53 | P02545 | Prelamin-A/C                                                          | <i>LMNA</i>        | 1.210 |
| 54 | P49321 | Nuclear autoantigenic sperm protein                                   | <i>NASP</i>        | 1.210 |
| 55 | Q9Y310 | tRNA-splicing ligase RtcB homolog                                     | <i>C22orf28</i>    | 1.209 |
| 56 | E9PF10 | Nuclear pore complex protein Nup155                                   | <i>NUP155</i>      | 1.206 |
| 57 | A6NKB8 | Aminopeptidase B                                                      | <i>RNPEP</i>       | 1.202 |
| 58 | P35221 | Catenin alpha-1                                                       | <i>CTNNA1</i>      | 1.201 |
| 59 | P04080 | Cystatin-B                                                            | <i>CSTB</i>        | 1.200 |
| 60 | P34897 | Serine hydroxymethyltransferase, mitochondrial                        | <i>SHMT2</i>       | 1.193 |
| 61 | P63208 | S-phase kinase-associated protein 1                                   | <i>SKP1</i>        | 1.189 |
| 62 | Q07065 | Cytoskeleton-associated protein 4                                     | <i>CKAP4</i>       | 1.186 |
| 63 | P30086 | Phosphatidylethanolamine-binding protein 1                            | <i>PEBP1</i>       | 1.186 |
| 64 | O75874 | Isocitrate dehydrogenase [NADP] cytoplasmic                           | <i>IDH1</i>        | 1.184 |
| 65 | H7C469 | Cathepsin D                                                           | <i>CTSD</i>        | 1.184 |
| 66 | P00352 | Retinal dehydrogenase 1                                               | <i>ALDH1A1</i>     | 1.183 |
| 67 | Q16555 | Dihydropyrimidinase-related protein 2                                 | <i>DPYSL2</i>      | 1.183 |
| 68 | P62158 | Calmodulin                                                            | <i>CALM1</i>       | 1.183 |
| 69 | O75367 | Core histone macro-H2A.1                                              | <i>H2AFY</i>       | 1.183 |
| 70 | H0YK49 | Electron transfer flavoprotein subunit alpha, mitochondrial           | <i>ETFa</i>        | 1.182 |
| 71 | P35580 | Myosin-10                                                             | <i>MYH10</i>       | 1.178 |
| 72 | P68402 | Platelet-activating factor acetylhydrolase IB subunit beta            | <i>PAFAH1B2</i>    | 1.178 |
| 73 | P07858 | Cathepsin B                                                           | <i>CTSB</i>        | 1.177 |
| 74 | A8MU58 | Aminoacyl tRNA synthase complex-interacting multifunctional protein 2 | <i>AIMP2</i>       | 1.176 |
| 75 | C9JH92 | Quinone oxidoreductase                                                | <i>CRYZ</i>        | 1.175 |
| 76 | P09417 | Dihydropteridine reductase                                            | <i>QDPR</i>        | 1.174 |
| 77 | E9PGT1 | Translin                                                              | <i>TSN</i>         | 1.174 |
| 78 | Q15274 | Nicotinate-nucleotide pyrophosphorylase [carboxylating]               | <i>QPRT</i>        | 1.170 |
| 79 | Q9H307 | Pinin                                                                 | <i>PNN</i>         | 1.167 |
| 80 | E7EMD0 | NADPH--cytochrome P450 reductase                                      | <i>POR</i>         | 1.166 |
| 81 | C9J9W2 | LIM and SH3 domain protein 1                                          | <i>LASP1</i>       | 1.164 |
| 82 | H0YJX6 | Protein arginine N-methyltransferase 5                                | <i>PRMT5</i>       | 1.163 |
| 83 | P51654 | Glypican-3                                                            | <i>GPC3</i>        | 1.159 |
| 84 | Q6DKJ4 | Nucleoredoxin                                                         | <i>NXN</i>         | 1.153 |

|     |        |                                                     |                 |       |
|-----|--------|-----------------------------------------------------|-----------------|-------|
| 85  | P07384 | Calpain-1 catalytic subunit                         | <i>CAPN1</i>    | 1.153 |
| 86  | Q15417 | Calponin-3                                          | <i>CNN3</i>     | 1.152 |
| 87  | P25786 | Proteasome subunit alpha type-1                     | <i>PSMA1</i>    | 1.152 |
| 88  | Q09666 | Neuroblast differentiation-associated protein AHNAK | <i>AHNAK</i>    | 1.151 |
| 89  | O43707 | Alpha-actinin-4                                     | <i>ACTN4</i>    | 1.151 |
| 90  | Q00688 | Peptidyl-prolyl cis-trans isomerase FKBP3           | <i>FKBP3</i>    | 1.150 |
| 91  | A6PVH9 | Copine-1                                            | <i>CPNE1</i>    | 1.149 |
| 92  | Q9BWD1 | Acetyl-CoA acetyltransferase, cytosolic             | <i>ACAT2</i>    | 1.147 |
| 93  | P61160 | Actin-related protein 2                             | <i>ACTR2</i>    | 1.145 |
| 94  | Q15293 | Reticulocalbin-1                                    | <i>RCN1</i>     | 1.143 |
| 95  | P04632 | Calpain small subunit 1                             | <i>CAPNS1</i>   | 1.143 |
| 96  | P11766 | Alcohol dehydrogenase class-3                       | <i>ADH5</i>     | 1.143 |
| 97  | A6PVN8 | Serine/threonine-protein phosphatase 2A activator   | <i>PPP2R4</i>   | 1.142 |
| 98  | H0Y3Y4 | Septin-7                                            | <i>42254</i>    | 1.140 |
| 99  | P30084 | Enoyl-CoA hydratase, mitochondrial                  | <i>ECHS1</i>    | 1.137 |
| 100 | P37837 | Transaldolase                                       | <i>TALDO1</i>   | 1.137 |
| 101 | P46783 | 40S ribosomal protein S10                           | <i>RPS10</i>    | 1.135 |
| 102 | Q9BSJ8 | Extended synaptotagmin-1                            | <i>ESYT1</i>    | 1.134 |
| 103 | O00425 | Insulin-like growth factor 2 mRNA-binding protein 3 | <i>IGF2BP3</i>  | 1.132 |
| 104 | P55735 | Protein SEC13 homolog                               | <i>SEC13</i>    | 1.130 |
| 105 | O43390 | Heterogeneous nuclear ribonucleoprotein R           | <i>HNRNPR</i>   | 1.130 |
| 106 | P10768 | S-formylglutathione hydrolase                       | <i>ESD</i>      | 1.125 |
| 107 | P48735 | Isocitrate dehydrogenase [NADP], mitochondrial      | <i>IDH2</i>     | 1.125 |
| 108 | P32119 | Peroxisredoxin-2                                    | <i>PRDX2</i>    | 1.125 |
| 109 | Q15149 | Plectin                                             | <i>PLEC</i>     | 1.121 |
| 110 | H7C2U6 | Protein NipSnap homolog 1                           | <i>NIPSNAP1</i> | 1.120 |
| 111 | P30044 | Peroxisredoxin-5, mitochondrial                     | <i>PRDX5</i>    | 1.117 |
| 112 | Q9NY33 | Dipeptidyl peptidase 3                              | <i>DPP3</i>     | 1.115 |
| 113 | P21333 | Filamin-A                                           | <i>FLNA</i>     | 1.115 |
| 114 | P62263 | 40S ribosomal protein S14                           | <i>RPS14</i>    | 1.115 |
| 115 | O75533 | Splicing factor 3B subunit 1                        | <i>SF3B1</i>    | 1.113 |
| 116 | C9JUG7 | F-actin-capping protein subunit alpha-2             | <i>CAPZA2</i>   | 1.113 |
| 117 | P45880 | Voltage-dependent anion-selective channel protein 2 | <i>VDAC2</i>    | 1.111 |
| 118 | Q86VP6 | Cullin-associated NEDD8-dissociated protein 1       | <i>CAND1</i>    | 1.111 |
| 119 | P68133 | Actin, alpha skeletal muscle                        | <i>ACTA1</i>    | 1.110 |
| 120 | B8ZZQ6 | Prothymosin alpha                                   | <i>PTMA</i>     | 1.110 |
| 121 | P46379 | Large proline-rich protein BAG6                     | <i>BAG6</i>     | 1.109 |
| 122 | P12270 | Nucleoprotein TPR                                   | <i>TPR</i>      | 1.107 |
| 123 | P26038 | Moesin                                              | <i>MSN</i>      | 1.107 |
| 124 | P68036 | Ubiquitin-conjugating enzyme E2 L3                  | <i>UBE2L3</i>   | 1.106 |
| 125 | Q14315 | Filamin-C                                           | <i>FLNC</i>     | 1.102 |
| 126 | H0YLC2 | Proteasome subunit alpha type                       | <i>PSMA4</i>    | 1.099 |
| 127 | P13797 | Plastin-3                                           | <i>PLS3</i>     | 1.097 |
| 128 | P30040 | Endoplasmic reticulum resident protein 29           | <i>ERP29</i>    | 1.096 |

|     |        |                                                      |                  |       |
|-----|--------|------------------------------------------------------|------------------|-------|
| 129 | P35232 | Prohibitin                                           | <i>PHB</i>       | 1.094 |
| 130 | Q96AE4 | Far upstream element-binding protein 1               | <i>FUBP1</i>     | 1.093 |
| 131 | P31948 | Stress-induced-phosphoprotein 1                      | <i>STIP1</i>     | 1.092 |
| 132 | E7EQR4 | Ezrin                                                | <i>EZR</i>       | 1.091 |
| 133 | P22626 | Heterogeneous nuclear ribonucleoproteins A2/B1       | <i>HNRNPA2B1</i> | 1.091 |
| 134 | P50395 | Rab GDP dissociation inhibitor beta                  | <i>GDI2</i>      | 1.091 |
| 135 | F8VVM2 | Phosphate carrier protein, mitochondrial             | <i>SLC25A3</i>   | 1.091 |
| 136 | P14324 | Farnesyl pyrophosphate synthase                      | <i>FDPS</i>      | 1.090 |
| 137 | F8VZ29 | Ubiquitin-conjugating enzyme E2 N                    | <i>UBE2N</i>     | 1.089 |
| 138 | P40925 | Malate dehydrogenase, cytoplasmic                    | <i>MDH1</i>      | 1.089 |
| 139 | P54727 | UV excision repair protein RAD23 homolog B           | <i>RAD23B</i>    | 1.089 |
| 140 | P08727 | Keratin, type I cytoskeletal 19                      | <i>KRT19</i>     | 1.088 |
| 141 | Q9Y4L1 | Hypoxia up-regulated protein 1                       | <i>HYOU1</i>     | 1.086 |
| 142 | E9PMH2 | Peptidyl-prolyl cis-trans isomerase                  | <i>AIP</i>       | 1.086 |
| 143 | Q99460 | 26S proteasome non-ATPase regulatory subunit 1       | <i>PSMD1</i>     | 1.085 |
| 144 | P07108 | Acyl-CoA-binding protein                             | <i>DBI</i>       | 1.083 |
| 145 | P00387 | NADH-cytochrome b5 reductase 3                       | <i>CYB5R3</i>    | 1.082 |
| 146 | P04792 | Heat shock protein beta-1                            | <i>HSPB1</i>     | 1.081 |
| 147 | P16422 | Epithelial cell adhesion molecule                    | <i>EPCAM</i>     | 1.080 |
| 148 | O96019 | Actin-like protein 6A                                | <i>ACTL6A</i>    | 1.079 |
| 149 | P09972 | Fructose-bisphosphate aldolase C                     | <i>ALDOC</i>     | 1.077 |
| 150 | Q92945 | Far upstream element-binding protein 2               | <i>KHSRP</i>     | 1.076 |
| 151 | Q15029 | 116 kDa U5 small nuclear ribonucleoprotein component | <i>EFTUD2</i>    | 1.075 |
| 152 | Q9H444 | Charged multivesicular body protein 4b               | <i>CHMP4B</i>    | 1.074 |
| 153 | P53396 | ATP-citrate synthase                                 | <i>ACLY</i>      | 1.074 |
| 154 | P51991 | Heterogeneous nuclear ribonucleoprotein A3           | <i>HNRNPA3</i>   | 1.074 |
| 155 | K7EJE8 | Lon protease homolog, mitochondrial                  | <i>LONP1</i>     | 1.073 |
| 156 | P18206 | Vinculin                                             | <i>VCL</i>       | 1.073 |
| 157 | Q99832 | T-complex protein 1 subunit eta                      | <i>CCT7</i>      | 1.072 |
| 158 | P68371 | Tubulin beta-4B chain                                | <i>TUBB4B</i>    | 1.071 |
| 159 | P52209 | 6-phosphogluconate dehydrogenase, decarboxylating    | <i>PGD</i>       | 1.068 |
| 160 | Q12906 | Interleukin enhancer-binding factor 3                | <i>ILF3</i>      | 1.067 |
| 161 | P23528 | Cofilin-1                                            | <i>CFL1</i>      | 1.066 |
| 162 | P46940 | Ras GTPase-activating-like protein IQGAP1            | <i>IQGAP1</i>    | 1.065 |
| 163 | Q92841 | Probable ATP-dependent RNA helicase DDX17            | <i>DDX17</i>     | 1.065 |
| 164 | P19338 | Nucleolin                                            | <i>NCL</i>       | 1.061 |
| 165 | P12004 | Proliferating cell nuclear antigen                   | <i>PCNA</i>      | 1.061 |
| 166 | O60701 | UDP-glucose 6-dehydrogenase                          | <i>UGDH</i>      | 1.060 |
| 167 | P23246 | Splicing factor, proline- and glutamine-rich         | <i>SFPQ</i>      | 1.059 |
| 168 | F5H018 | GTP-binding nuclear protein Ran                      | <i>RAN</i>       | 1.059 |
| 169 | P61981 | 14-3-3 protein gamma                                 | <i>YWHAQ</i>     | 1.059 |
| 170 | P09874 | Poly [ADP-ribose] polymerase 1                       | <i>PARP1</i>     | 1.059 |
| 171 | H0YE29 | Rho GTPase-activating protein 1                      | <i>ARHGAP1</i>   | 1.058 |
| 172 | P35637 | RNA-binding protein FUS                              | <i>FUS</i>       | 1.058 |

|     |        |                                                                             |                |       |
|-----|--------|-----------------------------------------------------------------------------|----------------|-------|
| 173 | Q12905 | Interleukin enhancer-binding factor 2                                       | <i>ILF2</i>    | 1.058 |
| 174 | Q13263 | Transcription intermediary factor 1-beta                                    | <i>TRIM28</i>  | 1.057 |
| 175 | D6RG15 | Twinfilin-2                                                                 | <i>TWF2</i>    | 1.056 |
| 176 | O15144 | Actin-related protein 2/3 complex subunit 2                                 | <i>ARPC2</i>   | 1.055 |
| 177 | Q07666 | KH domain-containing, RNA-binding, signal transduction-associated protein 1 | <i>KHDRBS1</i> | 1.055 |
| 178 | P68363 | Tubulin alpha-1B chain                                                      | <i>TUBA1B</i>  | 1.055 |
| 179 | O60664 | Perilipin-3                                                                 | <i>PLIN3</i>   | 1.053 |
| 180 | Q3ZCM7 | Tubulin beta-8 chain                                                        | <i>TUBB8</i>   | 1.053 |
| 181 | H7BZJ3 | Thioredoxin                                                                 | <i>PDIA3</i>   | 1.053 |
| 182 | P62258 | 14-3-3 protein epsilon                                                      | <i>YWHAE</i>   | 1.052 |
| 183 | Q9Y617 | Phosphoserine aminotransferase                                              | <i>PSAT1</i>   | 1.052 |
| 184 | P08758 | Annexin A5                                                                  | <i>ANXA5</i>   | 1.052 |
| 185 | P52272 | Heterogeneous nuclear ribonucleoprotein M                                   | <i>HNRNPM</i>  | 1.051 |
| 186 | P00558 | Phosphoglycerate kinase 1                                                   | <i>PGK1</i>    | 1.050 |
| 187 | B4DS13 | Eukaryotic translation initiation factor 4B                                 | <i>EIF4B</i>   | 1.050 |
| 188 | F8VPF3 | Myosin light polypeptide 6                                                  | <i>MYL6</i>    | 1.050 |
| 189 | P49411 | Elongation factor Tu, mitochondrial                                         | <i>TUFM</i>    | 1.049 |
| 190 | P46109 | Crk-like protein                                                            | <i>CRKL</i>    | 1.049 |
| 191 | Q08211 | ATP-dependent RNA helicase A                                                | <i>DHX9</i>    | 1.049 |
| 192 | F8VZX2 | Poly(rC)-binding protein 2                                                  | <i>PCBP2</i>   | 1.048 |
| 193 | P30101 | Protein disulfide-isomerase A3                                              | <i>PDIA3</i>   | 1.048 |
| 194 | P37802 | Transgelin-2                                                                | <i>TAGLN2</i>  | 1.047 |
| 195 | D6R938 | Calcium/calmodulin-dependent protein kinase type II subunit delta           | <i>CAMK2D</i>  | 1.047 |
| 196 | O60506 | Heterogeneous nuclear ribonucleoprotein Q                                   | <i>SYNCRIP</i> | 1.046 |
| 197 | P62424 | 60S ribosomal protein L7a                                                   | <i>RPL7A</i>   | 1.045 |
| 198 | P04075 | Fructose-bisphosphate aldolase A                                            | <i>ALDOA</i>   | 1.045 |
| 199 | Q9NYU2 | UDP-glucose:glycoprotein glucosyltransferase 1                              | <i>UGGT1</i>   | 1.044 |
| 200 | P25705 | ATP synthase subunit alpha, mitochondrial                                   | <i>ATP5A1</i>  | 1.043 |
| 201 | K7EK07 | Histone H3                                                                  | <i>H3F3B</i>   | 1.043 |
| 202 | P07814 | Bifunctional glutamate/proline--tRNA ligase                                 | <i>EPRS</i>    | 1.042 |
| 203 | P30041 | Peroxiredoxin-6                                                             | <i>PRDX6</i>   | 1.041 |
| 204 | P04406 | Glyceraldehyde-3-phosphate dehydrogenase                                    | <i>GAPDH</i>   | 1.040 |
| 205 | O14979 | Heterogeneous nuclear ribonucleoprotein D-like                              | <i>HNRPDL</i>  | 1.040 |
| 206 | Q8NC51 | Plasminogen activator inhibitor 1 RNA-binding protein                       | <i>SERBP1</i>  | 1.040 |
| 207 | O60888 | Protein CutA                                                                | <i>CUTA</i>    | 1.039 |
| 208 | Q9UHD8 | Septin-9                                                                    | <i>42256</i>   | 1.038 |
| 209 | Q14697 | Neutral alpha-glucosidase AB                                                | <i>GANAB</i>   | 1.038 |
| 210 | Q9UL46 | Proteasome activator complex subunit 2                                      | <i>PSME2</i>   | 1.038 |
| 211 | Q9NTK5 | Obg-like ATPase 1                                                           | <i>OLA1</i>    | 1.038 |
| 212 | Q9HC35 | Echinoderm microtubule-associated protein-like 4                            | <i>EML4</i>    | 1.037 |
| 213 | P35520 | Cystathionine beta-synthase                                                 | <i>CBS</i>     | 1.037 |
| 214 | P15924 | Desmoplakin                                                                 | <i>DSP</i>     | 1.037 |
| 215 | P20700 | Lamin-B1                                                                    | <i>LMNB1</i>   | 1.036 |

|     |        |                                                                       |                |       |
|-----|--------|-----------------------------------------------------------------------|----------------|-------|
| 216 | P31946 | 14-3-3 protein beta/alpha                                             | <i>YWHAB</i>   | 1.036 |
| 217 | Q15459 | Splicing factor 3A subunit 1                                          | <i>SF3A1</i>   | 1.036 |
| 218 | Q04760 | Lactoylglutathione lyase                                              | <i>GLO1</i>    | 1.036 |
| 219 | Q01105 | Protein SET                                                           | <i>SET</i>     | 1.035 |
| 220 | Q13907 | Isopentenyl-diphosphate Delta-isomerase 1                             | <i>IDII</i>    | 1.035 |
| 221 | P27695 | DNA-(apurinic or apyrimidinic site) lyase                             | <i>APEX1</i>   | 1.035 |
| 222 | P78344 | Eukaryotic translation initiation factor 4 gamma 2                    | <i>EIF4G2</i>  | 1.035 |
| 223 | P39748 | Flap endonuclease 1                                                   | <i>FEN1</i>    | 1.034 |
| 224 | Q9UNZ2 | NSFL1 cofactor p47                                                    | <i>NSFL1C</i>  | 1.034 |
| 225 | P43243 | Matrin-3                                                              | <i>MATR3</i>   | 1.034 |
| 226 | P54136 | Arginine--tRNA ligase, cytoplasmic                                    | <i>RARS</i>    | 1.033 |
| 227 | Q9P2E9 | Ribosome-binding protein 1                                            | <i>RRBP1</i>   | 1.033 |
| 228 | P60174 | Triosephosphate isomerase                                             | <i>TPII</i>    | 1.032 |
| 229 | P42167 | Lamina-associated polypeptide 2, isoforms beta/gamma                  | <i>TMPO</i>    | 1.032 |
| 230 | P12955 | Xaa-Pro dipeptidase                                                   | <i>PEPD</i>    | 1.032 |
| 231 | A2A2D0 | Stathmin                                                              | <i>STMN1</i>   | 1.031 |
| 232 | H0YA96 | Heterogeneous nuclear ribonucleoprotein D0                            | <i>HNRNPD</i>  | 1.031 |
| 233 | P12277 | Creatine kinase B-type                                                | <i>CKB</i>     | 1.031 |
| 234 | Q00839 | Heterogeneous nuclear ribonucleoprotein U                             | <i>HNRNPU</i>  | 1.030 |
| 235 | P62937 | Peptidyl-prolyl cis-trans isomerase A                                 | <i>PPIA</i>    | 1.030 |
| 236 | P07355 | Annexin A2                                                            | <i>ANXA2</i>   | 1.028 |
| 237 | P61158 | Actin-related protein 3                                               | <i>ACTR3</i>   | 1.027 |
| 238 | Q5JP53 | Tubulin beta chain                                                    | <i>TUBB</i>    | 1.026 |
| 239 | P63104 | 14-3-3 protein zeta/delta                                             | <i>YWHAZ</i>   | 1.025 |
| 240 | F6SBX2 | Isoleucine--tRNA ligase, mitochondrial                                | <i>LARS2</i>   | 1.025 |
| 241 | E7ETK0 | 40S ribosomal protein S24                                             | <i>RPS24</i>   | 1.024 |
| 242 | P09327 | Villin-1                                                              | <i>VIL1</i>    | 1.023 |
| 243 | P22102 | Trifunctional purine biosynthetic protein adenosine-3                 | <i>GART</i>    | 1.021 |
| 244 | P49588 | Alanine--tRNA ligase, cytoplasmic                                     | <i>AARS</i>    | 1.021 |
| 245 | P06576 | ATP synthase subunit beta, mitochondrial                              | <i>ATP5B</i>   | 1.020 |
| 246 | P48643 | T-complex protein 1 subunit epsilon                                   | <i>CCT5</i>    | 1.019 |
| 247 | P14866 | Heterogeneous nuclear ribonucleoprotein L                             | <i>HNRNPL</i>  | 1.019 |
| 248 | Q00610 | Clathrin heavy chain 1                                                | <i>CLTC</i>    | 1.017 |
| 249 | B4DJV2 | Citrate synthase                                                      | <i>CS</i>      | 1.016 |
| 250 | P28066 | Proteasome subunit alpha type-5                                       | <i>PSMA5</i>   | 1.016 |
| 251 | P50502 | Hsc70-interacting protein                                             | <i>STI3</i>    | 1.016 |
| 252 | P63261 | Actin, cytoplasmic 2                                                  | <i>ACTG1</i>   | 1.015 |
| 253 | P34932 | Heat shock 70 kDa protein 4                                           | <i>HSPA4</i>   | 1.015 |
| 254 | Q07955 | Serine/arginine-rich splicing factor 1                                | <i>SRSF1</i>   | 1.014 |
| 255 | Q12904 | Aminoacyl tRNA synthase complex-interacting multifunctional protein 1 | <i>AIMP1</i>   | 1.013 |
| 256 | Q9Y5B9 | FACT complex subunit SPT16                                            | <i>SUPT16H</i> | 1.013 |
| 257 | Q9Y265 | RuvB-like 1                                                           | <i>RUVBL1</i>  | 1.013 |
| 258 | P63010 | AP-2 complex subunit beta                                             | <i>AP2B1</i>   | 1.012 |
| 259 | P55060 | Exportin-2                                                            | <i>CSE1L</i>   | 1.012 |

|     |        |                                                                          |                  |       |
|-----|--------|--------------------------------------------------------------------------|------------------|-------|
| 260 | Q99613 | Eukaryotic translation initiation factor 3 subunit C                     | <i>EIF3C</i>     | 1.012 |
| 261 | P55072 | Transitional endoplasmic reticulum ATPase                                | <i>VCP</i>       | 1.009 |
| 262 | D6R9A6 | High mobility group protein B2                                           | <i>HMGB2</i>     | 1.009 |
| 263 | K7EJ78 | 40S ribosomal protein S15                                                | <i>RPS15</i>     | 1.009 |
| 264 | Q12874 | Splicing factor 3A subunit 3                                             | <i>SF3A3</i>     | 1.009 |
| 265 | P38646 | Stress-70 protein, mitochondrial                                         | <i>HSPA9</i>     | 1.007 |
| 266 | Q9NYL9 | Tropomodulin-3                                                           | <i>TMOD3</i>     | 1.006 |
| 267 | C9JJ34 | Ran-specific GTPase-activating protein                                   | <i>RANBP1</i>    | 1.006 |
| 268 | E9PLK3 | Puromycin-sensitive aminopeptidase                                       | <i>NPEPPS</i>    | 1.006 |
| 269 | P14868 | Aspartate--tRNA ligase, cytoplasmic                                      | <i>DARS</i>      | 1.005 |
| 270 | P27824 | Calnexin                                                                 | <i>CANX</i>      | 1.005 |
| 271 | Q16643 | Drebrin                                                                  | <i>DBN1</i>      | 1.004 |
| 272 | P05787 | Keratin, type II cytoskeletal 8                                          | <i>KRT8</i>      | 1.004 |
| 273 | Q9H6S3 | Epidermal growth factor receptor kinase substrate 8-like protein 2       | <i>EPS8L2</i>    | 1.004 |
| 274 | E9PCY7 | Heterogeneous nuclear ribonucleoprotein H                                | <i>HNRNPH1</i>   | 1.002 |
| 275 | P09382 | Galectin-1                                                               | <i>LGALS1</i>    | 1.002 |
| 276 | Q8WXF1 | Paraspeckle component 1                                                  | <i>PSPC1</i>     | 1.002 |
| 277 | P13489 | Ribonuclease inhibitor                                                   | <i>RNH1</i>      | 1.001 |
| 278 | P27348 | 14-3-3 protein theta                                                     | <i>YWHAQ</i>     | 1.001 |
| 279 | P30740 | Leukocyte elastase inhibitor                                             | <i>SERPINB1</i>  | 1.001 |
| 280 | B1AK85 | F-actin-capping protein subunit beta                                     | <i>CAPZB</i>     | 1.000 |
| 281 | P30048 | Thioredoxin-dependent peroxide reductase, mitochondrial                  | <i>PRDX3</i>     | 1.000 |
| 282 | O75083 | WD repeat-containing protein 1                                           | <i>WDR1</i>      | 1.000 |
| 283 | Q16777 | Histone H2A type 2-C                                                     | <i>HIST2H2AC</i> | 0.999 |
| 284 | Q9Y490 | Talin-1                                                                  | <i>TLN1</i>      | 0.997 |
| 285 | Q5T7C4 | High mobility group protein B1                                           | <i>HMGB1</i>     | 0.997 |
| 286 | P13010 | X-ray repair cross-complementing protein 5                               | <i>XRCC5</i>     | 0.997 |
| 287 | P26368 | Splicing factor U2AF 65 kDa subunit                                      | <i>U2AF2</i>     | 0.997 |
| 288 | P04844 | Dolichyl-diphosphooligosaccharide--protein glycosyltransferase subunit 2 | <i>RPN2</i>      | 0.997 |
| 289 | Q14204 | Cytoplasmic dynein 1 heavy chain 1                                       | <i>DYNC1H1</i>   | 0.996 |
| 290 | Q5VU59 | —                                                                        | <i>TPM3</i>      | 0.996 |
| 291 | P11047 | Laminin subunit gamma-1                                                  | <i>LAMC1</i>     | 0.995 |
| 292 | P35606 | Coatomer subunit beta                                                    | <i>COPB2</i>     | 0.995 |
| 293 | P17174 | Aspartate aminotransferase, cytoplasmic                                  | <i>GOT1</i>      | 0.995 |
| 294 | K7ELL7 | Glucosidase 2 subunit beta                                               | <i>PRKCSH</i>    | 0.995 |
| 295 | P07237 | Protein disulfide-isomerase                                              | <i>P4HB</i>      | 0.994 |
| 296 | P61978 | Heterogeneous nuclear ribonucleoprotein K                                | <i>HNRNPK</i>    | 0.994 |
| 297 | Q9BTT0 | Acidic leucine-rich nuclear phosphoprotein 32 family member E            | <i>ANP32E</i>    | 0.994 |
| 298 | Q9Y624 | Junctional adhesion molecule A                                           | <i>F11R</i>      | 0.993 |
| 299 | F8WJN3 | Cleavage and polyadenylation specificity factor subunit 6                | <i>CPSF6</i>     | 0.992 |
| 300 | P61026 | Ras-related protein Rab-10                                               | <i>RAB10</i>     | 0.992 |
| 301 | Q01081 | Splicing factor U2AF 35 kDa subunit                                      | <i>U2AF1</i>     | 0.991 |
| 302 | Q15084 | Protein disulfide-isomerase A6                                           | <i>PDIA6</i>     | 0.989 |
| 303 | K7ERT7 | Synaptic vesicle membrane protein VAT-1 homolog                          | <i>VAT1</i>      | 0.989 |



|     |        |                                                                    |                 |       |
|-----|--------|--------------------------------------------------------------------|-----------------|-------|
| 304 | Q71DI3 | Histone H3.2                                                       | <i>HIST2H3A</i> | 0.988 |
| 305 | O43809 | Cleavage and polyadenylation specificity factor subunit 5          | <i>NUDT21</i>   | 0.988 |
| 306 | P26639 | Threonine--tRNA ligase, cytoplasmic                                | <i>TARS</i>     | 0.988 |
| 307 | P51858 | Hepatoma-derived growth factor                                     | <i>HDGF</i>     | 0.988 |
| 308 | P56192 | Methionine--tRNA ligase, cytoplasmic                               | <i>MARS</i>     | 0.987 |
| 309 | F8W7C6 | —                                                                  | <i>RPL10</i>    | 0.987 |
| 310 | P49327 | Fatty acid synthase                                                | <i>FASN</i>     | 0.987 |
| 311 | Q15185 | Prostaglandin E synthase 3                                         | <i>PTGES3</i>   | 0.987 |
| 312 | P62314 | Small nuclear ribonucleoprotein Sm D1                              | <i>SNRPD1</i>   | 0.986 |
| 313 | Q13813 | Spectrin alpha chain, non-erythrocytic 1                           | <i>SPTAN1</i>   | 0.984 |
| 314 | Q96P70 | Importin-9                                                         | <i>IPO9</i>     | 0.983 |
| 315 | P26196 | Probable ATP-dependent RNA helicase DDX6                           | <i>DDX6</i>     | 0.983 |
| 316 | F8W6I7 | Heterogeneous nuclear ribonucleoprotein A1                         | <i>HNRNPA1</i>  | 0.982 |
| 317 | Q14974 | Importin subunit beta-1                                            | <i>KPNB1</i>    | 0.980 |
| 318 | P50990 | T-complex protein 1 subunit theta                                  | <i>CCT8</i>     | 0.980 |
| 319 | P06733 | Alpha-enolase                                                      | <i>ENO1</i>     | 0.979 |
| 320 | Q15233 | Non-POU domain-containing octamer-binding protein                  | <i>NONO</i>     | 0.979 |
| 321 | P18669 | Phosphoglycerate mutase 1                                          | <i>PGAM1</i>    | 0.978 |
| 322 | Q13492 | Phosphatidylinositol-binding clathrin assembly protein             | <i>PICALM</i>   | 0.978 |
| 323 | Q01518 | Adenylyl cyclase-associated protein 1                              | <i>CAP1</i>     | 0.977 |
| 324 | E7EUY0 | DNA-dependent protein kinase catalytic subunit                     | <i>PRKDC</i>    | 0.977 |
| 325 | P12956 | X-ray repair cross-complementing protein 6                         | <i>XRCC6</i>    | 0.977 |
| 326 | Q13162 | Peroxiredoxin-4                                                    | <i>PRDX4</i>    | 0.976 |
| 327 | B7Z7P8 | Eukaryotic peptide chain release factor subunit 1                  | <i>ETF1</i>     | 0.976 |
| 328 | P13667 | Protein disulfide-isomerase A4                                     | <i>PDIA4</i>    | 0.975 |
| 329 | P26599 | Polypyrimidine tract-binding protein 1                             | <i>PTBP1</i>    | 0.975 |
| 330 | F8VWS0 | 60S acidic ribosomal protein P0                                    | <i>RPLP0</i>    | 0.975 |
| 331 | P62979 | Ubiquitin-40S ribosomal protein S27a                               | <i>RPS27A</i>   | 0.975 |
| 332 | P35268 | 60S ribosomal protein L22                                          | <i>RPL22</i>    | 0.974 |
| 333 | Q9Y281 | Cofilin-2                                                          | <i>CFL2</i>     | 0.973 |
| 334 | O00299 | Chloride intracellular channel protein 1                           | <i>CLIC1</i>    | 0.973 |
| 335 | P62136 | Serine/threonine-protein phosphatase PP1-alpha catalytic subunit   | <i>PPP1CA</i>   | 0.972 |
| 336 | Q96PK6 | RNA-binding protein 14                                             | <i>RBM14</i>    | 0.972 |
| 337 | P08238 | Heat shock protein HSP 90-beta                                     | <i>HSP90AB1</i> | 0.971 |
| 338 | O43143 | Putative pre-mRNA-splicing factor ATP-dependent RNA helicase DHX15 | <i>DHX15</i>    | 0.970 |
| 339 | P62805 | Histone H4                                                         | <i>HIST1H4A</i> | 0.970 |
| 340 | P41250 | Glycine--tRNA ligase                                               | <i>GARS</i>     | 0.969 |
| 341 | Q92598 | Heat shock protein 105 kDa                                         | <i>HSPH1</i>    | 0.969 |
| 342 | B7Z972 | Protein-L-isoaspartate O-methyltransferase                         | <i>PCMT1</i>    | 0.969 |
| 343 | P10809 | 60 kDa heat shock protein, mitochondrial                           | <i>HSPD1</i>    | 0.967 |
| 344 | Q86UY0 | Thioredoxin domain-containing protein 5                            | <i>TXNDC5</i>   | 0.967 |
| 345 | O60488 | Long-chain-fatty-acid--CoA ligase 4                                | <i>ACSL4</i>    | 0.967 |
| 346 | Q13838 | Spliceosome RNA helicase DDX39B                                    | <i>DDX39B</i>   | 0.966 |
| 347 | P49773 | Histidine triad nucleotide-binding protein 1                       | <i>HINT1</i>    | 0.966 |

|     |        |                                                                                   |                  |       |
|-----|--------|-----------------------------------------------------------------------------------|------------------|-------|
| 348 | O14579 | Coatomer subunit epsilon                                                          | <i>COPE</i>      | 0.966 |
| 349 | Q9UJZ1 | Stomatin-like protein 2, mitochondrial                                            | <i>STOML2</i>    | 0.965 |
| 350 | P14625 | Endoplasmic                                                                       | <i>HSP90B1</i>   | 0.965 |
| 351 | Q92499 | ATP-dependent RNA helicase DDX1                                                   | <i>DDX1</i>      | 0.964 |
| 352 | Q32Q12 | Nucleoside diphosphate kinase                                                     | <i>NME1-NME2</i> | 0.964 |
| 353 | Q9NQC3 | Reticulon-4                                                                       | <i>RTN4</i>      | 0.964 |
| 354 | F5GY37 | Prohibitin-2                                                                      | <i>PHB2</i>      | 0.963 |
| 355 | P49915 | GMP synthase [glutamine-hydrolyzing]                                              | <i>GMPS</i>      | 0.961 |
| 356 | P26640 | Valine--tRNA ligase                                                               | <i>VARS</i>      | 0.960 |
| 357 | Q08945 | FACT complex subunit SSRP1                                                        | <i>SSRP1</i>     | 0.960 |
| 358 | Q10567 | AP-1 complex subunit beta-1                                                       | <i>AP1B1</i>     | 0.960 |
| 359 | P49257 | Protein ERGIC-53                                                                  | <i>LMAN1</i>     | 0.959 |
| 360 | P50454 | Serpin H1                                                                         | <i>SERPINH1</i>  | 0.958 |
| 361 | Q9UKY7 | Protein CDV3 homolog                                                              | <i>CDV3</i>      | 0.957 |
| 362 | P14618 | Pyruvate kinase PKM                                                               | <i>PKM</i>       | 0.957 |
| 363 | Q14444 | Caprin-1                                                                          | <i>CAPRIN1</i>   | 0.955 |
| 364 | P40926 | Malate dehydrogenase, mitochondrial                                               | <i>MDH2</i>      | 0.955 |
| 365 | P05455 | Lupus La protein                                                                  | <i>SSB</i>       | 0.955 |
| 366 | F8VY35 | Nucleosome assembly protein 1-like 1                                              | <i>NAP1L1</i>    | 0.955 |
| 367 | P05198 | Eukaryotic translation initiation factor 2 subunit 1                              | <i>EIF2S1</i>    | 0.955 |
| 368 | P05783 | Keratin, type I cytoskeletal 18                                                   | <i>KRT18</i>     | 0.955 |
| 369 | P11021 | 78 kDa glucose-regulated protein                                                  | <i>HSPA5</i>     | 0.954 |
| 370 | Q9NZI8 | Insulin-like growth factor 2 mRNA-binding protein 1                               | <i>IGF2BP1</i>   | 0.954 |
| 371 | P12814 | Alpha-actinin-1                                                                   | <i>ACTN1</i>     | 0.953 |
| 372 | E9PPJ0 | Splicing factor 3B subunit 2                                                      | <i>SF3B2</i>     | 0.953 |
| 373 | P28838 | Cytosol aminopeptidase                                                            | <i>LAP3</i>      | 0.953 |
| 374 | P23526 | Adenosylhomocysteinase                                                            | <i>AHCY</i>      | 0.952 |
| 375 | Q5QPQ0 | Acyl-protein thioesterase 2                                                       | <i>LYPLA2</i>    | 0.951 |
| 376 | Q06830 | Peroxiredoxin-1                                                                   | <i>PRDX1</i>     | 0.951 |
| 377 | Q9BR76 | Coronin-1B                                                                        | <i>CORO1B</i>    | 0.951 |
| 378 | P42224 | Signal transducer and activator of transcription 1-alpha/beta                     | <i>STAT1</i>     | 0.950 |
| 379 | H0YEN5 | 40S ribosomal protein S2                                                          | <i>RPS2</i>      | 0.950 |
| 380 | P43686 | 26S protease regulatory subunit 6B                                                | <i>PSMC4</i>     | 0.949 |
| 381 | P07900 | Heat shock protein HSP 90-alpha                                                   | <i>HSP90AA1</i>  | 0.949 |
| 382 | Q99714 | 3-hydroxyacyl-CoA dehydrogenase type-2                                            | <i>HSD17B10</i>  | 0.947 |
| 383 | H0YFA4 | Cysteine-rich protein 2                                                           | <i>CRIP2</i>     | 0.947 |
| 384 | J3KPE3 | Guanine nucleotide-binding protein subunit beta-2-like 1                          | <i>GNB2L1</i>    | 0.946 |
| 385 | Q14247 | Src substrate cortactin                                                           | <i>CTTN</i>      | 0.945 |
| 386 | P30153 | Serine/threonine-protein phosphatase 2A 65 kDa regulatory subunit A alpha isoform | <i>PPP2R1A</i>   | 0.945 |
| 387 | P18124 | 60S ribosomal protein L7                                                          | <i>RPL7</i>      | 0.944 |
| 388 | P04040 | Catalase                                                                          | <i>CAT</i>       | 0.944 |
| 389 | P53618 | Coatomer subunit beta                                                             | <i>COPB1</i>     | 0.943 |
| 390 | P30050 | 60S ribosomal protein L12                                                         | <i>RPL12</i>     | 0.943 |
| 391 | P07737 | Profilin-1                                                                        | <i>PFN1</i>      | 0.942 |

|     |            |                                                      |                  |       |
|-----|------------|------------------------------------------------------|------------------|-------|
| 392 | P68431     | Histone H3.1                                         | <i>HIST1H3A</i>  | 0.942 |
| 393 | P27797     | Calreticulin                                         | <i>CALR</i>      | 0.941 |
| 394 | P21796     | Voltage-dependent anion-selective channel protein 1  | <i>VDAC1</i>     | 0.940 |
| 395 | Q00341     | Vigilin                                              | <i>HDLBP</i>     | 0.940 |
| 396 | P01024     | Complement C3                                        | <i>C3</i>        | 0.939 |
| 397 | P50991     | T-complex protein 1 subunit delta                    | <i>CCT4</i>      | 0.939 |
| 398 | A0A075B730 | Epiplakin                                            | <i>EPPK1</i>     | 0.937 |
| 399 | Q13200     | 26S proteasome non-ATPase regulatory subunit 2       | <i>PSMD2</i>     | 0.937 |
| 400 | Q9HB71     | Calcyclin-binding protein                            | <i>CACYBP</i>    | 0.936 |
| 401 | P60228     | Eukaryotic translation initiation factor 3 subunit E | <i>EIF3E</i>     | 0.934 |
| 402 | P00390     | Glutathione reductase, mitochondrial                 | <i>GSR</i>       | 0.933 |
| 403 | P17844     | Probable ATP-dependent RNA helicase DDX5             | <i>DDX5</i>      | 0.932 |
| 404 | Q92616     | Translational activator GCN1                         | <i>GCN1L1</i>    | 0.932 |
| 405 | Q99880     | Histone H2B type 1-L                                 | <i>HIST1H2BL</i> | 0.931 |
| 406 | O43776     | Asparagine--tRNA ligase, cytoplasmic                 | <i>NARS</i>      | 0.931 |
| 407 | Q15942     | Zyxin                                                | <i>ZYX</i>       | 0.931 |
| 408 | P26641     | Elongation factor 1-gamma                            | <i>EEF1G</i>     | 0.931 |
| 409 | P53621     | Coatomer subunit alpha                               | <i>COPA</i>      | 0.930 |
| 410 | P25787     | Proteasome subunit alpha type-2                      | <i>PSMA2</i>     | 0.927 |
| 411 | E7ES10     | Calpastatin                                          | <i>CAST</i>      | 0.925 |
| 412 | P46777     | 60S ribosomal protein L5                             | <i>RPL5</i>      | 0.923 |
| 413 | O95373     | Importin-7                                           | <i>IPO7</i>      | 0.923 |
| 414 | O00151     | PDZ and LIM domain protein 1                         | <i>PDLIM1</i>    | 0.923 |
| 415 | E9PLD0     | Ras-related protein Rab-1B                           | <i>RAB1B</i>     | 0.920 |
| 416 | C9J9K3     | 40S ribosomal protein SA                             | <i>RPSA</i>      | 0.919 |
| 417 | Q96124     | Far upstream element-binding protein 3               | <i>FUBP3</i>     | 0.918 |
| 418 | E7EQV3     | Polyadenylate-binding protein 1                      | <i>PABPC1</i>    | 0.918 |
| 419 | G3V119     | DBIRD complex subunit KIAA1967                       | <i>KIAA1967</i>  | 0.918 |
| 420 | P05387     | 60S acidic ribosomal protein P2                      | <i>RPLP2</i>     | 0.917 |
| 421 | P00338     | L-lactate dehydrogenase A chain                      | <i>LDHA</i>      | 0.917 |
| 422 | O00303     | Eukaryotic translation initiation factor 3 subunit F | <i>EIF3F</i>     | 0.916 |
| 423 | Q01082     | Spectrin beta chain, non-erythrocytic 1              | <i>SPTBN1</i>    | 0.916 |
| 424 | P61604     | 10 kDa heat shock protein, mitochondrial             | <i>HSPE1</i>     | 0.915 |
| 425 | Q9NS69     | Mitochondrial import receptor subunit TOM22 homolog  | <i>TOMM22</i>    | 0.915 |
| 426 | P63241     | Eukaryotic translation initiation factor 5A-1        | <i>EIF5A</i>     | 0.914 |
| 427 | E9PBS1     | Multifunctional protein ADE2                         | <i>PAICS</i>     | 0.914 |
| 428 | P29692     | Elongation factor 1-delta                            | <i>EEF1D</i>     | 0.910 |
| 429 | P24534     | Elongation factor 1-beta                             | <i>EEF1B2</i>    | 0.910 |
| 430 | H0Y4R1     | Inosine-5-monophosphate dehydrogenase 2              | <i>IMPDH2</i>    | 0.908 |
| 431 | P36578     | 60S ribosomal protein L4                             | <i>RPL4</i>      | 0.907 |
| 432 | P39023     | 60S ribosomal protein L3                             | <i>RPL3</i>      | 0.906 |
| 433 | Q9BSE5     | Agmatinase, mitochondrial                            | <i>AGMAT</i>     | 0.906 |
| 434 | P06748     | Nucleophosmin                                        | <i>NPM1</i>      | 0.906 |
| 435 | Q8NE71     | ATP-binding cassette sub-family F member 1           | <i>ABCF1</i>     | 0.906 |

|     |        |                                                      |                |       |
|-----|--------|------------------------------------------------------|----------------|-------|
| 436 | P07954 | Fumarate hydratase, mitochondrial                    | <i>FH</i>      | 0.905 |
| 437 | Q15181 | Inorganic pyrophosphatase                            | <i>PPA1</i>    | 0.905 |
| 438 | O00410 | Importin-5                                           | <i>IPO5</i>    | 0.905 |
| 439 | H3BT13 | Small nuclear ribonucleoprotein Sm D3                | <i>SNRPD3</i>  | 0.903 |
| 440 | P31689 | DnaJ homolog subfamily A member 1                    | <i>DNAJAI</i>  | 0.903 |
| 441 | Q15056 | Eukaryotic translation initiation factor 4H          | <i>EIF4H</i>   | 0.902 |
| 442 | Q96QK1 | Vacuolar protein sorting-associated protein 35       | <i>VPS35</i>   | 0.902 |
| 443 | Q15365 | Poly(rC)-binding protein 1                           | <i>PCBP1</i>   | 0.902 |
| 444 | P23381 | Tryptophan--tRNA ligase, cytoplasmic                 | <i>WARS</i>    | 0.902 |
| 445 | P05386 | 60S acidic ribosomal protein P1                      | <i>RPLP1</i>   | 0.900 |
| 446 | O75937 | DnaJ homolog subfamily C member 8                    | <i>DNAJC8</i>  | 0.900 |
| 447 | Q9Y333 | U6 snRNA-associated Sm-like protein LSm2             | <i>LSM2</i>    | 0.900 |
| 448 | P58546 | Myotrophin                                           | <i>MTPN</i>    | 0.900 |
| 449 | P62701 | 40S ribosomal protein S4, X isoform                  | <i>RPS4X</i>   | 0.899 |
| 450 | Q9Y678 | Coatomer subunit gamma-1                             | <i>COPG1</i>   | 0.898 |
| 451 | E7EX73 | Eukaryotic translation initiation factor 4 gamma 1   | <i>EIF4G1</i>  | 0.897 |
| 452 | Q7KZF4 | Staphylococcal nuclease domain-containing protein 1  | <i>SND1</i>    | 0.897 |
| 453 | P62081 | 40S ribosomal protein S7                             | <i>RPS7</i>    | 0.894 |
| 454 | P06744 | Glucose-6-phosphate isomerase                        | <i>GPI</i>     | 0.893 |
| 455 | P31942 | Heterogeneous nuclear ribonucleoprotein H3           | <i>HNRNPH3</i> | 0.891 |
| 456 | P40227 | T-complex protein 1 subunit zeta                     | <i>CCT6A</i>   | 0.891 |
| 457 | P78347 | General transcription factor II-I                    | <i>GTF2I</i>   | 0.890 |
| 458 | P11387 | DNA topoisomerase 1                                  | <i>TOP1</i>    | 0.889 |
| 459 | Q13347 | Eukaryotic translation initiation factor 3 subunit I | <i>EIF3I</i>   | 0.889 |
| 460 | M0QZS6 | SUMO-activating enzyme subunit 1                     | <i>SAE1</i>    | 0.888 |
| 461 | E9PRQ7 | UBX domain-containing protein 1                      | <i>UBXN1</i>   | 0.887 |
| 462 | P42704 | Leucine-rich PPR motif-containing protein            | <i>LRPPRC</i>  | 0.887 |
| 463 | P11142 | Heat shock cognate 71 kDa protein                    | <i>HSPA8</i>   | 0.886 |
| 464 | K7EJL1 | AP-1 complex subunit mu-1                            | <i>AP1M1</i>   | 0.886 |
| 465 | P61353 | 60S ribosomal protein L27                            | <i>RPL27</i>   | 0.885 |
| 466 | Q99497 | Protein DJ-1                                         | <i>PARK7</i>   | 0.884 |
| 467 | Q13126 | S-methyl-5-thioadenosine phosphorylase               | <i>MTAP</i>    | 0.884 |
| 468 | Q14566 | DNA replication licensing factor MCM6                | <i>MCM6</i>    | 0.883 |
| 469 | B4DUR8 | T-complex protein 1 subunit gamma                    | <i>CCT3</i>    | 0.882 |
| 470 | P55884 | Eukaryotic translation initiation factor 3 subunit B | <i>EIF3B</i>   | 0.882 |
| 471 | B4DQU5 | Ras-related protein Rab-11A                          | <i>RAB11A</i>  | 0.881 |
| 472 | O43852 | Calumenin                                            | <i>CALU</i>    | 0.879 |
| 473 | P13639 | Elongation factor 2                                  | <i>EEF2</i>    | 0.878 |
| 474 | P33991 | DNA replication licensing factor MCM4                | <i>MCM4</i>    | 0.877 |
| 475 | P68104 | Elongation factor 1-alpha 1                          | <i>EEF1A1</i>  | 0.875 |
| 476 | G3V1A1 | 60S ribosomal protein L8                             | <i>RPL8</i>    | 0.875 |
| 477 | P06493 | Cyclin-dependent kinase 1                            | <i>CDK1</i>    | 0.873 |
| 478 | P42166 | Lamina-associated polypeptide 2, isoform alpha       | <i>TMPO</i>    | 0.873 |
| 479 | P60842 | Eukaryotic initiation factor 4A-I                    | <i>EIF4A1</i>  | 0.871 |

|     |        |                                                         |                |       |
|-----|--------|---------------------------------------------------------|----------------|-------|
| 480 | P84077 | ADP-ribosylation factor 1                               | <i>ARF1</i>    | 0.868 |
| 481 | P62906 | 60S ribosomal protein L10a                              | <i>RPL10A</i>  | 0.868 |
| 482 | P51149 | Ras-related protein Rab-7a                              | <i>RAB7A</i>   | 0.867 |
| 483 | P25398 | 40S ribosomal protein S12                               | <i>RPS12</i>   | 0.862 |
| 484 | P08670 | Vimentin                                                | <i>VIM</i>     | 0.862 |
| 485 | J3KTF8 | Rho GDP-dissociation inhibitor 1                        | <i>ARHGDI1</i> | 0.861 |
| 486 | B4E022 | Transketolase                                           | <i>TKT</i>     | 0.860 |
| 487 | Q92575 | UBX domain-containing protein 4                         | <i>UBXN4</i>   | 0.859 |
| 488 | P02768 | Serum albumin                                           | <i>ALB</i>     | 0.857 |
| 489 | Q9UMS4 | Pre-mRNA-processing factor 19                           | <i>PRPF19</i>  | 0.855 |
| 490 | Q96AG4 | Leucine-rich repeat-containing protein 59               | <i>LRRC59</i>  | 0.854 |
| 491 | P02787 | Serotransferrin                                         | <i>TF</i>      | 0.853 |
| 492 | Q02790 | Peptidyl-prolyl cis-trans isomerase FKBP4               | <i>FKBP4</i>   | 0.852 |
| 493 | Q06210 | Glutamine--fructose-6-phosphate aminotransferase 1      | <i>GFPT1</i>   | 0.852 |
| 494 | P78371 | T-complex protein 1 subunit beta                        | <i>CCT2</i>    | 0.849 |
| 495 | P29966 | Myristoylated alanine-rich C-kinase substrate           | <i>MARCKS</i>  | 0.849 |
| 496 | M0QXN5 | Nuclear pore glycoprotein p62                           | <i>NUP62</i>   | 0.848 |
| 497 | P62633 | Cellular nucleic acid-binding protein                   | <i>CNBP</i>    | 0.848 |
| 498 | P46060 | Ran GTPase-activating protein 1                         | <i>RANGAP1</i> | 0.847 |
| 499 | P30085 | UMP-CMP kinase                                          | <i>CMPK1</i>   | 0.845 |
| 500 | P31939 | Bifunctional purine biosynthesis protein PURH           | <i>ATIC</i>    | 0.844 |
| 501 | K7EL02 | Thimet oligopeptidase                                   | <i>THOP1</i>   | 0.844 |
| 502 | P40939 | Trifunctional enzyme subunit alpha, mitochondrial       | <i>HADHA</i>   | 0.839 |
| 503 | P20290 | Transcription factor BTF3                               | <i>BTF3</i>    | 0.839 |
| 504 | D6RG13 | 40S ribosomal protein S3a                               | <i>RPS3A</i>   | 0.837 |
| 505 | E5RI99 | 60S ribosomal protein L30                               | <i>RPL30</i>   | 0.832 |
| 506 | Q9UQ80 | Proliferation-associated protein 2G4                    | <i>PA2G4</i>   | 0.831 |
| 507 | C9JNR4 | Transforming protein RhoA                               | <i>RHOA</i>    | 0.830 |
| 508 | F8VUA6 | 60S ribosomal protein L18                               | <i>RPL18</i>   | 0.827 |
| 509 | Q96KP4 | Cytosolic non-specific dipeptidase                      | <i>CNDP2</i>   | 0.822 |
| 510 | Q6P2Q9 | Pre-mRNA-processing-splicing factor 8                   | <i>PRPF8</i>   | 0.821 |
| 511 | P13284 | Gamma-interferon-inducible lysosomal thiol reductase    | <i>IFI30</i>   | 0.819 |
| 512 | Q15424 | Scaffold attachment factor B1                           | <i>SAFB</i>    | 0.819 |
| 513 | O95433 | Activator of 90 kDa heat shock protein ATPase homolog 1 | <i>AHSA1</i>   | 0.815 |
| 514 | P21291 | Cysteine and glycine-rich protein 1                     | <i>CSRPI</i>   | 0.815 |
| 515 | O00571 | ATP-dependent RNA helicase DDX3X                        | <i>DDX3X</i>   | 0.813 |
| 516 | P67809 | Nuclease-sensitive element-binding protein 1            | <i>YBX1</i>    | 0.812 |
| 517 | A6NHL2 | Tubulin alpha chain-like 3                              | <i>TUBAL3</i>  | 0.810 |
| 518 | Q9UHX1 | Poly(U)-binding-splicing factor PUF60                   | <i>PUF60</i>   | 0.808 |
| 519 | P41252 | Isoleucine--tRNA ligase, cytoplasmic                    | <i>IARS</i>    | 0.802 |
| 520 | Q8WUM4 | Programmed cell death 6-interacting protein             | <i>PDCD6IP</i> | 0.800 |
| 521 | Q14152 | Eukaryotic translation initiation factor 3 subunit A    | <i>EIF3A</i>   | 0.796 |
| 522 | E7EMC7 | Sequestosome-1                                          | <i>SQSTM1</i>  | 0.794 |
| 523 | O95573 | Long-chain-fatty-acid--CoA ligase 3                     | <i>ACSL3</i>   | 0.793 |

|     |        |                                                      |               |       |
|-----|--------|------------------------------------------------------|---------------|-------|
| 524 | F5GWX5 | Chromodomain-helicase-DNA-binding protein 4          | <i>CHD4</i>   | 0.785 |
| 525 | K7EJ57 | Mitochondrial import receptor subunit TOM40 homolog  | <i>TOMM40</i> | 0.782 |
| 526 | P20042 | Eukaryotic translation initiation factor 2 subunit 2 | <i>EIF2S2</i> | 0.778 |
| 527 | Q9ULV4 | Coronin-1C                                           | <i>CORO1C</i> | 0.772 |
| 528 | P02786 | Transferrin receptor protein 1                       | <i>TFRC</i>   | 0.771 |
| 529 | P36542 | ATP synthase subunit gamma, mitochondrial            | <i>ATP5C1</i> | 0.751 |
| 530 | Q9BXP5 | Serrate RNA effector molecule homolog                | <i>SRRT</i>   | 0.750 |
| 531 | Q13185 | Chromobox protein homolog 3                          | <i>CBX3</i>   | 0.710 |
| 532 | D3YTB1 | 60S ribosomal protein L32                            | <i>RPL32</i>  | 0.704 |
| 533 | Q15393 | Splicing factor 3B subunit 3                         | <i>SF3B3</i>  | 0.700 |
| 534 | Q16836 | Hydroxyacyl-coenzyme A dehydrogenase, mitochondrial  | <i>HADH</i>   | 0.689 |
| 535 | P00505 | Aspartate aminotransferase, mitochondrial            | <i>GOT2</i>   | 0.667 |
| 536 | Q96FW1 | Ubiquitin thioesterase OTUB1                         | <i>OTUB1</i>  | 0.637 |
| 537 | H0Y8E6 | DNA replication licensing factor MCM2                | <i>MCM2</i>   | 0.623 |
| 538 | B4DDF4 | Calponin-2                                           | <i>CNN2</i>   | 0.618 |
| 539 | Q9UDY2 | Tight junction protein ZO-2                          | <i>TJP2</i>   | 0.582 |
| 540 | Q70CQ2 | Ubiquitin carboxyl-terminal hydrolase 34             | <i>USP34</i>  | 0.553 |
| 541 | P04264 | Keratin, type II cytoskeletal 1                      | <i>KRT1</i>   | 0.441 |
| 542 | P35527 | Keratin, type I cytoskeletal 9                       | <i>KRT9</i>   | 0.155 |

Table S2. The 94 Ingenuity Canonical Pathways regulated by Danu in Hep3B cells (sorted by log P value).

| No. | Ingenuity canonical pathways                         |
|-----|------------------------------------------------------|
| 1   | EIF2 Signaling                                       |
| 2   | Regulation of eIF4 and p70S6K Signaling              |
| 3   | Remodeling of Epithelial Adherens Junctions          |
| 4   | mTOR Signaling                                       |
| 5   | Protein Ubiquitination Pathway                       |
| 6   | tRNA Charging                                        |
| 7   | Epithelial Adherens Junction Signaling               |
| 8   | RAN Signaling                                        |
| 9   | Glycolysis I                                         |
| 10  | Gluconeogenesis I                                    |
| 11  | Actin Cytoskeleton Signaling                         |
| 12  | RhoA Signaling                                       |
| 13  | ILK Signaling                                        |
| 14  | Unfolded protein response                            |
| 15  | Regulation of Cellular Mechanics by Calpain Protease |
| 16  | Tight Junction Signaling                             |
| 17  | Germ Cell-Sertoli Cell Junction Signaling            |
| 18  | Integrin Signaling                                   |
| 19  | Caveolar-mediated Endocytosis Signaling              |
| 20  | 14-3-3-mediated Signaling                            |
| 21  | Aldosterone Signaling in Epithelial Cells            |
| 22  | Signaling by Rho Family GTPases                      |
| 23  | Clathrin-mediated Endocytosis Signaling              |

---

|    |                                                                         |
|----|-------------------------------------------------------------------------|
| 24 | Purine Nucleotides De Novo Biosynthesis II                              |
| 25 | RhoGDI Signaling                                                        |
| 26 | HIPPO signaling                                                         |
| 27 | Aspartate Degradation II                                                |
| 28 | Leukocyte Extravasation Signaling                                       |
| 29 | PI3K/AKT Signaling                                                      |
| 30 | Cell Cycle: G2/M DNA Damage Checkpoint Regulation                       |
| 31 | Regulation of Actin-based Motility by Rho                               |
| 32 | Glutaryl-CoA Degradation                                                |
| 33 | Pentose Phosphate Pathway                                               |
| 34 | Fc $\gamma$ Receptor-mediated Phagocytosis in Macrophages and Monocytes |
| 35 | BER pathway                                                             |
| 36 | p70S6K Signaling                                                        |
| 37 | Isoleucine Degradation I                                                |
| 38 | ERK/MAPK Signaling                                                      |
| 39 | Lipid Antigen Presentation by CD1                                       |
| 40 | Telomere Extension by Telomerase                                        |
| 41 | Virus Entry via Endocytic Pathways                                      |
| 42 | Mitochondrial Dysfunction                                               |
| 43 | Ephrin B Signaling                                                      |
| 44 | Mechanisms of Viral Exit from Host Cells                                |
| 45 | VEGF Signaling                                                          |
| 46 | Spliceosomal Cycle                                                      |
| 47 | L-cysteine Degradation                                                  |
| 48 | Formaldehyde Oxidation II (Glutathione-dependent)                       |
| 49 | Superpathway of Cholesterol Biosynthesis                                |

---



---

|    |                                                              |
|----|--------------------------------------------------------------|
| 50 | Superpathway of Geranylgeranyldiphosphate Biosynthesis I     |
| 51 | Protein Kinase A Signaling                                   |
| 52 | Sucrose Degradation V (Mammalian)                            |
| 53 | Superpathway of Methionine Degradation                       |
| 54 | Hypoxia Signaling in the Cardiovascular System               |
| 55 | Breast Cancer Regulation by Stathmin 1                       |
| 56 | Tryptophan Degradation III (Eukaryotic)                      |
| 57 | Mitotic Roles of Polo-like Kinase                            |
| 58 | Endoplasmic Reticulum Stress Pathway                         |
| 59 | FAK signaling                                                |
| 60 | Inosine-5'-phosphate Biosynthesis II                         |
| 61 | Glutamate Degradation II                                     |
| 62 | Aspartate Biosynthesis                                       |
| 63 | Apoptosis signaling                                          |
| 64 | Semaphorin signaling in neurons                              |
| 65 | TCA cycle II (Eukaryotic)                                    |
| 66 | Myc mediated Apoptosis signaling                             |
| 67 | L-cysteine Degradation I                                     |
| 68 | Mevalonate Pathway I                                         |
| 69 | Paxillin Signaling                                           |
| 70 | DNA Double-Strand Break Repair by Non-Homologous End Joining |
| 71 | Rac Signaling                                                |
| 72 | ERK5 Signaling                                               |
| 73 | Pentose Phosphate Pathway (Oxidative Branch)                 |
| 74 | Trans-farnesyl Diphosphate Biosynthesis                      |
| 75 | Huntingtons Disease Signaling                                |

---

---

|    |                                                   |
|----|---------------------------------------------------|
| 76 | Gap junction Signaling                            |
| 77 | Agrin Interactions at Neuromuscular Junction      |
| 78 | $\gamma$ -linolenate Biosynthesis II (Animals)    |
| 79 | Pentose Phosphate Pathway (Non-oxidative Branch)  |
| 80 | Ethanol Degradation II                            |
| 81 | Aryl Hydrocarbon Receptor Signaling               |
| 82 | Xenobiotic Metabolism Signaling                   |
| 83 | Ethanol Degradation IV                            |
| 84 | Cysteine biosynthesis III (mammalia)              |
| 85 | Stearate Biosynthesis I (Animals)                 |
| 86 | Superpathway of Serine and Glycine Biosynthesis I |
| 87 | Superoxide Radicals Degradation                   |
| 88 | IGF-1 Signaling                                   |
| 89 | Granzyme A Signaling                              |
| 90 | CDK 5 Signaling                                   |
| 91 | Telomerase Signaling                              |
| 92 | Axonal Guidance Signaling                         |
| 93 | Prostate Cancer Signaling                         |
| 94 | Ketolysis                                         |
| 95 | Acetyl-CoA biosynthesis III (from Citrate)        |
| 96 | Ketogenesis                                       |

---

Table S3. The top 18 enriched clusters (Enrichment score >5) by the DAVID database for the target list of Danu.

| Category                    | Term                                           | Gene Count | P-Value  | Fold Enrichment | FDR      |
|-----------------------------|------------------------------------------------|------------|----------|-----------------|----------|
| <b>Annotation Cluster 1</b> | <b>Enrichment Score: 18.57</b>                 |            |          |                 |          |
| GOTERM_CC_FAT               | intracellular organelle lumen                  | 134        | 8.00E-25 | 2.46            | 1.12E-21 |
| GOTERM_CC_FAT               | membrane-enclosed lumen                        | 137        | 1.29E-24 | 2.41            | 1.80E-21 |
| GOTERM_CC_FAT               | organelle lumen                                | 135        | 2.13E-24 | 2.42            | 2.97E-21 |
| GOTERM_CC_FAT               | nuclear lumen                                  | 98         | 2.89E-14 | 2.20            | 4.02E-11 |
| GOTERM_CC_FAT               | nucleoplasm                                    | 59         | 2.12E-08 | 2.18            | 2.95E-05 |
| <b>Annotation Cluster 2</b> | <b>Enrichment Score: 17.19</b>                 |            |          |                 |          |
| GOTERM_CC_FAT               | ribonucleoprotein complex                      | 78         | 1.61E-32 | 4.94            | 2.24E-29 |
| SP_PIR_KEYWORDS             | RNA-binding                                    | 63         | 4.11E-26 | 5.07            | 5.82E-23 |
| GOTERM_MF_FAT               | RNA binding                                    | 82         | 1.05E-24 | 3.62            | 1.57E-21 |
| SP_PIR_KEYWORDS             | mRNA splicing                                  | 33         | 1.40E-17 | 6.86            | 1.98E-14 |
| GOTERM_BP_FAT               | mRNA metabolic process                         | 48         | 2.27E-17 | 4.32            | 3.91E-14 |
| GOTERM_BP_FAT               | RNA splicing                                   | 42         | 2.96E-17 | 4.93            | 5.09E-14 |
| <b>Annotation Cluster 3</b> | <b>Enrichment Score: 16.37</b>                 |            |          |                 |          |
| GOTERM_CC_FAT               | Intracellular non-membrane-bounded organelle   | 161        | 1.82E-21 | 2.02            | 2.54E-18 |
| GOTERM_CC_FAT               | non-membrane-bounded organelle                 | 161        | 1.82E-21 | 2.02            | 2.54E-18 |
| GOTERM_CC_FAT               | cytoskeleton                                   | 80         | 2.18E-08 | 1.89            | 3.04E-05 |
| <b>Annotation Cluster 4</b> | <b>Enrichment Score: 13.89</b>                 |            |          |                 |          |
| SP_PIR_KEYWORDS             | isopeptide bond                                | 39         | 7.06E-17 | 5.31            | 1.55E-13 |
| UP_SEQ_FEATURE              | cross-link: Glycyl lysine isopeptide (Lys-Gly) | 29         | 1.85E-14 | 6.29            | 3.08E-11 |
| SP_PIR_KEYWORDS             | ubl conjugation                                | 46         | 1.57E-12 | 3.40            | 2.22E-09 |
| <b>Annotation Cluster 5</b> | <b>Enrichment Score: 13.72</b>                 |            |          |                 |          |
| SP_PIR_KEYWORDS             | Chaperone                                      | 28         | 2.94E-16 | 7.69            | 4.66E-13 |

|                             |                                      |    |          |       |          |
|-----------------------------|--------------------------------------|----|----------|-------|----------|
| GOTERM_MF_FAT               | unfolded protein binding             | 27 | 1.35E-15 | 7.43  | 1.99E-12 |
| GOTERM_BP_FAT               | protein folding                      | 27 | 1.73E-11 | 5.08  | 2.98E-08 |
| <b>Annotation Cluster 6</b> | <b>Enrichment Score: 13.12</b>       |    |          |       |          |
| GOTERM_CC_FAT               | pigment granule                      | 30 | 1.71E-22 | 10.99 | 2.38E-19 |
| GOTERM_CC_FAT               | melanosome                           | 30 | 1.71E-22 | 10.99 | 2.38E-19 |
| GOTERM_CC_FAT               | membrane-bounded vesicle             | 48 | 4.30E-10 | 2.76  | 5.99E-07 |
| GOTERM_CC_FAT               | cytoplasmic membrane-bounded vesicle | 47 | 4.76E-10 | 2.79  | 6.64E-07 |
| GOTERM_CC_FAT               | vesicle                              | 51 | 3.92E-09 | 2.48  | 5.46E-06 |
| GOTERM_CC_FAT               | cytoplasmic vesicle                  | 49 | 7.84E-09 | 2.49  | 1.09E-05 |
| <b>Annotation Cluster 7</b> | <b>Enrichment Score: 12.00</b>       |    |          |       |          |
| SP_PIR_KEYWORDS             | RNA-binding                          | 63 | 4.11E-26 | 5.07  | 5.82E-23 |
| UP_SEQ_FEATURE              | RRM 1                                | 20 | 1.61E-12 | 8.54  | 2.67E-09 |
| UP_SEQ_FEATURE              | RRM 2                                | 20 | 1.61E-12 | 8.54  | 2.67E-09 |
| SMART                       | RRM                                  | 27 | 2.04E-12 | 5.51  | 2.38E-09 |
| INTERPRO                    | RNA recognition motif, RNP-1         | 27 | 6.03E-11 | 4.86  | 9.40E-08 |
| INTERPRO                    | Nucleotide-binding, alpha-beta plait | 27 | 7.46E-11 | 4.81  | 1.16E-07 |
| UP_SEQ_FEATURE              | RRM 3                                | 7  | 9.93E-04 | 6.04  | 1.635972 |
| <b>Annotation Cluster 8</b> | <b>Enrichment Score: 11.14</b>       |    |          |       |          |
| SP_PIR_KEYWORDS             | protein biosynthesis                 | 51 | 5.11E-39 | 11.78 | 7.24E-36 |
| GOTERM_BP_FAT               | translation                          | 56 | 6.37E-26 | 5.64  | 1.10E-22 |
| GOTERM_BP_FAT               | translational elongation             | 27 | 1.20E-17 | 8.91  | 2.07E-14 |
| SP_PIR_KEYWORDS             | ribonucleoprotein                    | 37 | 3.65E-17 | 5.76  | 5.16E-14 |
| SP_PIR_KEYWORDS             | ribosome                             | 19 | 3.90E-14 | 11.30 | 5.52E-11 |
| GOTERM_CC_FAT               | cytosolic part                       | 27 | 7.44E-13 | 5.79  | 1.04E-09 |
| <b>Annotation Cluster 9</b> | <b>Enrichment Score: 7.55</b>        |    |          |       |          |
| GOTERM_BP_FAT               | response to unfolded protein         | 17 | 2.20E-10 | 7.98  | 3.79E-07 |

|                              |                                                      |     |          |       |          |
|------------------------------|------------------------------------------------------|-----|----------|-------|----------|
| GOTERM_BP_FAT                | response to protein stimulus                         | 18  | 1.76E-08 | 5.61  | 3.02E-05 |
| SP_PIR_KEYWORDS              | stress response                                      | 13  | 2.99E-08 | 8.55  | 4.24E-05 |
| GOTERM_BP_FAT                | response to organic substance                        | 45  | 5.31E-06 | 2.08  | 0.009138 |
| <b>Annotation Cluster 10</b> | <b>Enrichment Score: 7.45</b>                        |     |          |       |          |
| GOTERM_BP_FAT                | cellular macromolecular complex assembly             | 34  | 4.66E-10 | 3.56  | 8.03E-07 |
| GOTERM_BP_FAT                | cellular macromolecular complex subunit organization | 36  | 6.33E-10 | 3.36  | 1.09E-06 |
| GOTERM_BP_FAT                | macromolecular complex assembly                      | 51  | 1.56E-09 | 2.56  | 2.68E-06 |
| GOTERM_BP_FAT                | macromolecular complex subunit organization          | 53  | 1.79E-09 | 2.49  | 3.07E-06 |
| GOTERM_BP_FAT                | protein complex assembly                             | 36  | 3.41E-06 | 2.38  | 0.005866 |
| GOTERM_BP_FAT                | protein complex biogenesis                           | 36  | 3.41E-06 | 2.38  | 0.005866 |
| <b>Annotation Cluster 11</b> | <b>Enrichment Score: 7.41</b>                        |     |          |       |          |
| GOTERM_MF_FAT                | nucleotide binding                                   | 137 | 1.37E-15 | 1.93  | 1.99E-12 |
| SP_PIR_KEYWORDS              | nucleotide-binding                                   | 91  | 2.13E-14 | 2.34  | 3.02E-11 |
| SP_PIR_KEYWORDS              | ATP-binding                                          | 76  | 2.81E-13 | 2.49  | 3.98E-10 |
| GOTERM_MF_FAT                | ATP binding                                          | 81  | 6.82E-07 | 1.74  | 0.001018 |
| GOTERM_MF_FAT                | adenyl ribonucleotide binding                        | 81  | 1.16E-06 | 1.71  | 0.001735 |
| GOTERM_MF_FAT                | ribonucleotide binding                               | 94  | 1.37E-06 | 1.62  | 0.00204  |
| <b>Annotation Cluster 12</b> | <b>Enrichment Score: 6.54</b>                        |     |          |       |          |
| SP_PIR_KEYWORDS              | actin binding                                        | 14  | 2.86E-12 | 15.20 | 4.05E-09 |
| SP_PIR_KEYWORDS              | actin-binding                                        | 29  | 3.65E-12 | 5.10  | 5.16E-09 |
| GOTERM_MF_FAT                | actin binding                                        | 34  | 3.11E-09 | 3.30  | 4.64E-06 |
| GOTERM_MF_FAT                | cytoskeletal protein binding                         | 43  | 7.82E-09 | 2.70  | 1.17E-05 |
| GOTERM_CC_FAT                | cytoskeleton                                         | 80  | 2.18E-08 | 1.89  | 3.04E-05 |
| SP_PIR_KEYWORDS              | cytoskeleton                                         | 39  | 8.33E-08 | 2.66  | 1.18E-04 |
| <b>Annotation Cluster 13</b> | <b>Enrichment Score: 5.97</b>                        |     |          |       |          |
| UP_SEQ_FEATURE               | KH 3                                                 | 8   | 1.01E-08 | 24.65 | 1.67E-05 |

|                              |                                                               |    |          |       |          |
|------------------------------|---------------------------------------------------------------|----|----------|-------|----------|
| UP_SEQ_FEATURE               | KH 4                                                          | 6  | 1.31E-07 | 36.98 | 2.17E-04 |
| UP_SEQ_FEATURE               | KH 1                                                          | 8  | 6.00E-07 | 15.01 | 9.96E-04 |
| UP_SEQ_FEATURE               | KH 2                                                          | 8  | 6.00E-07 | 15.01 | 9.96E-04 |
| INTERPRO                     | K Homology, type 1                                            | 9  | 1.67E-06 | 10.35 | 0.002605 |
| INTERPRO                     | K Homology, type 1, subgroup                                  | 9  | 2.70E-06 | 9.76  | 0.004217 |
| <b>Annotation Cluster 14</b> | <b>Enrichment Score: 5.84</b>                                 |    |          |       |          |
| GOTERM_BP_FAT                | glucose catabolic process                                     | 15 | 1.14E-09 | 8.62  | 1.95E-06 |
| GOTERM_BP_FAT                | hexose catabolic process                                      | 15 | 1.28E-08 | 7.24  | 2.21E-05 |
| GOTERM_BP_FAT                | monosaccharide catabolic process                              | 15 | 1.89E-08 | 7.04  | 3.25E-05 |
| GOTERM_BP_FAT                | glycolysis                                                    | 12 | 9.98E-08 | 8.51  | 1.72E-04 |
| GOTERM_BP_FAT                | alcohol catabolic process                                     | 15 | 1.09E-07 | 6.17  | 1.88E-04 |
| GOTERM_BP_FAT                | cellular carbohydrate catabolic process                       | 15 | 2.04E-07 | 5.88  | 3.51E-04 |
| <b>Annotation Cluster 15</b> | <b>Enrichment Score: 5.81</b>                                 |    |          |       |          |
| SP_PIR_KEYWORDS              | stress response                                               | 13 | 2.99E-08 | 8.55  | 4.24E-05 |
| INTERPRO                     | Heat shock protein 70                                         | 7  | 2.58E-07 | 22.14 | 4.03E-04 |
| INTERPRO                     | Heat shock protein Hsp70                                      | 7  | 2.58E-07 | 22.14 | 4.03E-04 |
| INTERPRO                     | Heat shock protein 70, conserved site                         | 7  | 1.31E-06 | 17.71 | 0.002039 |
| PIR_SUPERFAMILY              | chaperone HSP70                                               | 4  | 0.003395 | 12.01 | 4.440052 |
| <b>Annotation Cluster 16</b> | <b>Enrichment Score: 5.65</b>                                 |    |          |       |          |
| GOTERM_BP_FAT                | tRNA aminoacylation                                           | 14 | 5.32E-10 | 10.14 | 9.15E-07 |
| GOTERM_BP_FAT                | amino acid activation                                         | 14 | 5.32E-10 | 10.14 | 9.15E-07 |
| GOTERM_BP_FAT                | tRNA aminoacylation for protein translation                   | 14 | 5.32E-10 | 10.14 | 9.15E-07 |
| SP_PIR_KEYWORDS              | Aminoacyl-tRNA synthetase                                     | 12 | 7.83E-10 | 13.36 | 1.11E-06 |
| GOTERM_MF_FAT                | ligase activity, forming aminoacyl-tRNA and related compounds | 13 | 1.57E-08 | 8.76  | 2.34E-05 |
| GOTERM_MF_FAT                | ligase activity, forming carbon-oxygen bonds                  | 13 | 1.57E-08 | 8.76  | 2.34E-05 |

| <b>Annotation Cluster 17</b> |                                              | <b>Enrichment Score: 5.49</b> |          |       |          |
|------------------------------|----------------------------------------------|-------------------------------|----------|-------|----------|
| INTERPRO                     | Chaperone, tailless complex polypeptide 1    | 7                             | 1.32E-07 | 24.15 | 2.06E-04 |
| INTERPRO                     | Chaperonin Cpn60/TCP-1                       | 7                             | 1.31E-06 | 17.71 | 0.002039 |
| INTERPRO                     | Chaperonin TCP-1, conserved site             | 6                             | 2.78E-06 | 22.77 | 0.004332 |
| PIR_SUPERFAMILY              | molecular chaperone t-complex-type           | 6                             | 2.53E-05 | 14.41 | 0.033807 |
| GOTERM_CC_FAT                | chaperonin-containing T-complex              | 5                             | 2.81E-05 | 23.29 | 0.039078 |
| <b>Annotation Cluster 18</b> |                                              | <b>Enrichment Score: 5.18</b> |          |       |          |
| GOTERM_BP_FAT                | negative regulation of apoptosis             | 29                            | 2.84E-06 | 2.73  | 0.004896 |
| GOTERM_BP_FAT                | negative regulation of programmed cell death | 29                            | 3.73E-06 | 2.69  | 0.00642  |
| GOTERM_BP_FAT                | negative regulation of cell death            | 29                            | 3.93E-06 | 2.68  | 0.006773 |
| GOTERM_BP_FAT                | regulation of apoptosis                      | 48                            | 7.92E-06 | 1.99  | 0.01364  |
| GOTERM_BP_FAT                | regulation of programmed cell death          | 48                            | 1.03E-05 | 1.97  | 0.017716 |
| GOTERM_BP_FAT                | regulation of cell death                     | 48                            | 1.13E-05 | 1.96  | 0.019376 |
| GOTERM_BP_FAT                | anti-apoptosis                               | 20                            | 1.39E-05 | 3.23  | 0.023852 |
